# Supplementary material for: Gold nanorods-mediated efficient synergistic immunotherapy for detection and inhibition of postoperative tumor recurrence
Source: PubMed Central journal article supplement — Acta Pharm Sin B. 2021 Mar 26;11(7):1978–92. doi: 10.1016/j.apsb.2021.03.035 (PMC8343192; doi:10.1016/j.apsb.2021.03.035), 2021-03-26
Supplement: mmc1.pdf [file mmc1.pdf]

## ORIGINAL ARTICLE

# Gold nanorods-mediated efficient synergistic immunotherapy for detection and inhibition of postoperative tumor recurrence

Yingying Zhang<sup>a,b</sup>, Tiange Wang<sup>a,b</sup>, Yu Tian<sup>a,b</sup>, Chaonan Zhang<sup>a,b</sup>, Kun Ge<sup>c</sup>, Jinchao Zhang<sup>c</sup>, Jin Chang<sup>a,b,\*</sup>, Hanjie Wang<sup>a,b,\*</sup>

<sup>a</sup>*School of Life Sciences, Tianjin University, Tianjin 300072, China*

<sup>b</sup>*Tianjin Engineering Center of Micro-Nano Biomaterials and Detection-Treatment Technology, Tianjin Key Laboratory of Function and Application of Biological Macromolecular Structures, Tianjin 300072, China*

<sup>c</sup>*College of Chemistry & Environmental Science, Key Laboratory of Medicinal Chemistry and Molecular Diagnosis of the Ministry of Education, Chemical Biology Key Laboratory of Hebei Province, Hebei University, Baoding 071002, China*

Received 17 November 2020; received in revised form 31 January 2021; accepted 4 February 2021

\*Corresponding authors. Tel./fax: +86 022 87898212 (Jin Chang); +86 022 87898212 (Hanjie Wang).

E-mail addresses: jinchang@tju.edu.cn (Jin Chang), wanghj@tju.edu.cn (Hanjie Wang).

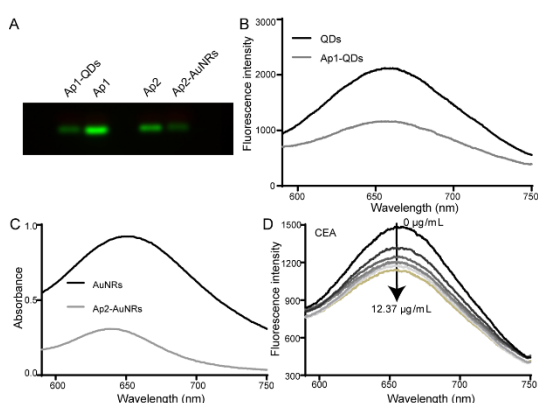

**Figure S1** Characterization of CEA aptamer modified CdTe QDs and AuNRs. (A) Polyacrylamide gel electrophoresis to identify the conjugation of CEA Aptamer to CdTe QDs and AuNRs; (B) Fluorescence spectra of CdTe QDs before and after the conjugation of CEA aptamer suspended in ddH<sub>2</sub>O at  $\lambda_{ex}$ =570 nm; (C) UV-Vis spectra of AuNRs and Ap2-AuNRs dissolved in ddH<sub>2</sub>O; (D) The

Fluorescence spectra of Hydrogel-IFN- $\gamma$ -QA incubated with different concentrations of CEA standard (from 0 to 12.37  $\mu\text{g/mL}$ ).

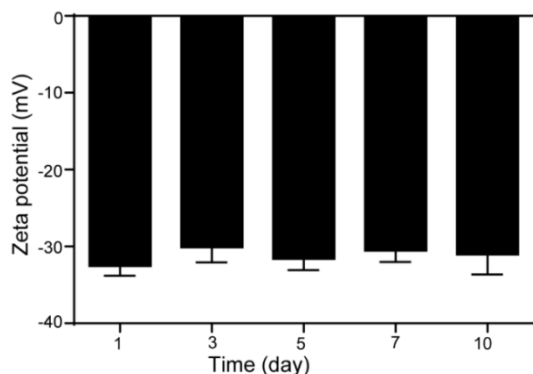

**Figure S2** Stability of Hydrogel+IFN- $\gamma$ +QA. Changes of zeta potential were measured by DLS. Data are presented as mean  $\pm$ SD ( $n=3$ ).

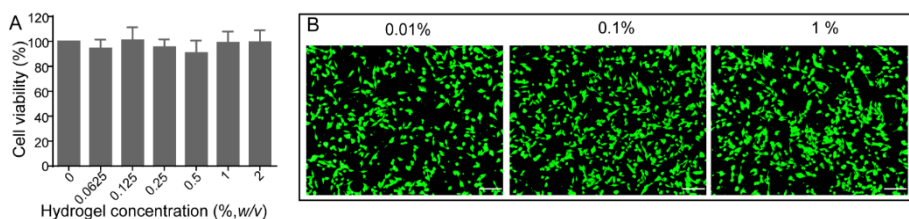

**Figure S3** Cytotoxicity of thermal responsive hydrogels to tumor cells. a) Cell viability of LLC cells treated with Hydrogel for 24 h; Data are expressed as mean  $\pm$ SD ( $n=5$ ). b) AM/PI staining of LLC cells incubated with different concentrations of Hydrogel for 24 h.

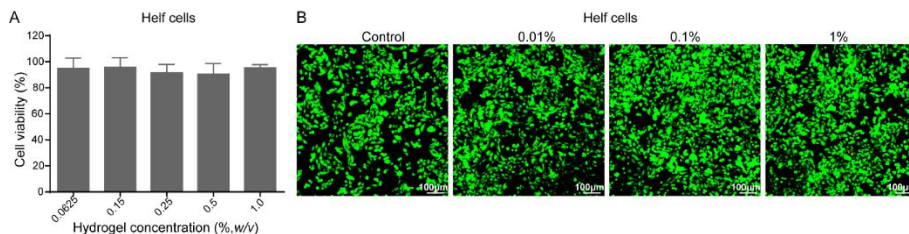

**Figure S4** Cytotoxicity of thermal responsive hydrogels to normal cells. a) Cell viability of Helf cells treated with Hydrogel for 24 h; Data are expressed as mean  $\pm$ SD ( $n=5$ ). b) AM/PI staining of Helf cells incubated with different concentrations of Hydrogel for 24 h.

**Table S1** IC<sub>50</sub> values of IFN- $\gamma$  and Hydrogel+IFN- $\gamma$ +QA against LLC cells for 24 h ( $n=5$ ).

| Sample                     | IC <sub>50</sub> ( $\mu\text{g/mL}$ ) |
|----------------------------|---------------------------------------|
| IFN- $\gamma$              | 6.41                                  |
| Hydrogel+IFN- $\gamma$ +QA | 6.66                                  |

IFN- $\gamma$ , interferon- $\gamma$ ; Hydrogel+IFN- $\gamma$ +QA, thermal responsive hydrogels co-loaded with AP1-QDs, AP2-AuNRs, and interferon- $\gamma$ .

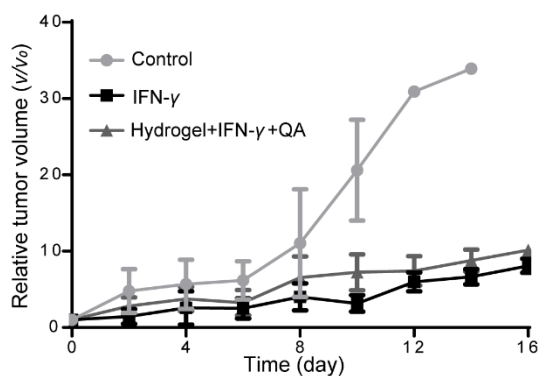

**Figure S5** The relative tumor volume changes of *in situ* recurrence mice with different treatments based on Fig. 3E. Data are presented as mean  $\pm$ SD ( $n=5$ ).

**Table S2** The median survival of three groups for inhibition of postoperative tumor recurrence *in situ*.

| Group                  | Median survival (day) |
|------------------------|-----------------------|
| Control                | 11                    |
| IFN- $\gamma$          | 13                    |
| Hydrogel+IFN- $\gamma$ | 16                    |

IFN- $\gamma$ , interferon- $\gamma$ ; Hydrogel+IFN- $\gamma$ , thermal responsive hydrogels loaded with interferon- $\gamma$ .

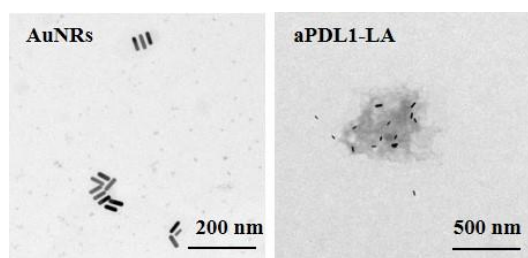

**Figure S6** TEM images of AuNRs and aPDL1-LA.

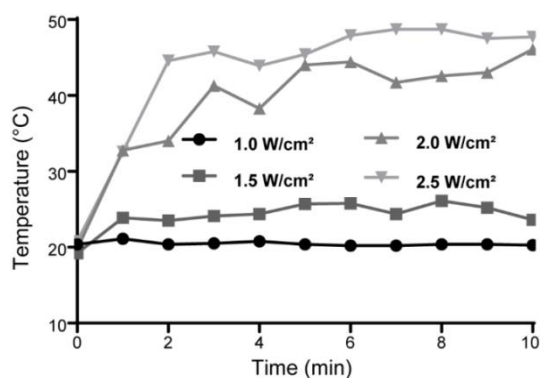

**Figure S7** The temperature changes of AuNRs (20  $\mu$ g/mL) irradiated with 808 nm laser at different power intensities.

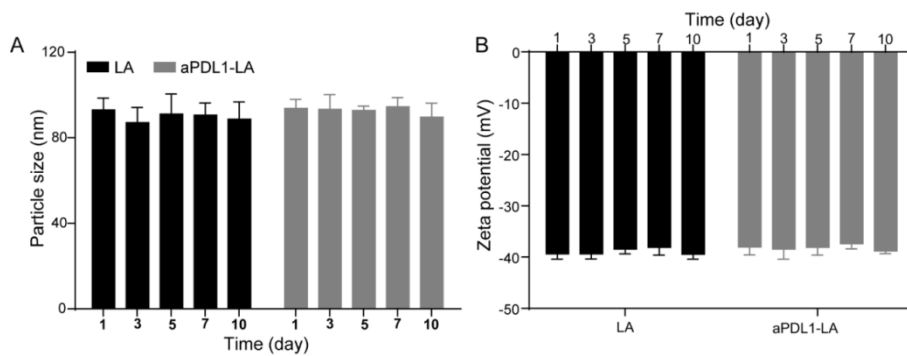

**Figure S8** Stabilities of LA and aPDL1-LA. (A) Changes of particle size of LA and aPDL1-LA; (B) Changes of zeta potential of LA and aPDL1-LA. Data are presented as mean  $\pm$ SD ( $n=3$ ).

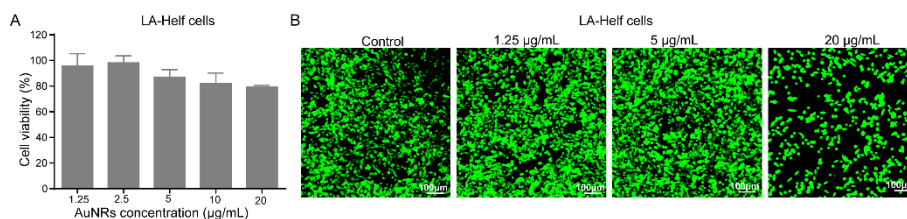

**Figure S9** Cytotoxicity of LA to normal cells. (A) Cell viability of Heif cells treated with LA for 24 h; Data are expressed as mean  $\pm$ SD ( $n=5$ ); (B) AM/PI staining of Heif cells incubated with different concentrations of LA for 24 h.

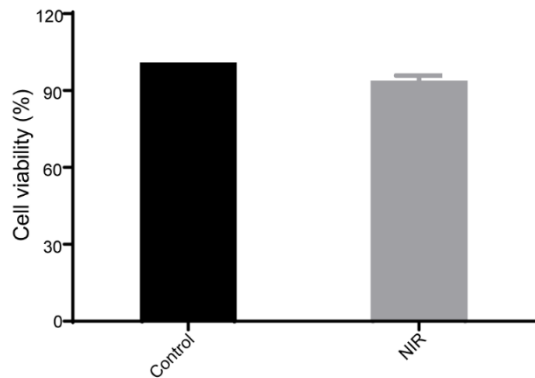

**Figure S10** Cytotoxicity of NIR laser. Cell viability of LLC cells treated with 808 nm laser (2.0  $\text{W/cm}^2$ , 5 min). Data of NIR group are presented as mean  $\pm$ SD ( $n=5$ ).

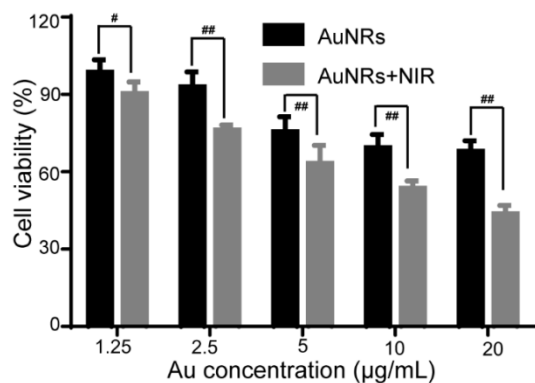

**Figure S11** Cell viability of LLC cells treated with different concentrations of AuNRs with or without irradiation for 24 h. Data are presented as mean  $\pm$ SD ( $n=5$ ).  $^{\#}P < 0.05$ ,  $^{\#\#}P < 0.01$  compared with AuNRs group by Student's  $t$ -test.

**Table S3** IC<sub>50</sub> values of LA, LA+NIR, aPDL1-LA, and aPDL1-LA+NIR against LLC cells ( $n=5$ ).

| Sample       | IC <sub>50</sub> ( $\mu$ g/mL) |
|--------------|--------------------------------|
| LA           | 30.11                          |
| LA+NIR       | 12.13                          |
| aPDL1-LA     | 10.37                          |
| aPDL1-LA+NIR | 5.65                           |

LA, liposomes encapsulated AuNRs; LA+NIR, liposomes-encapsulated AuNRs with near-infrared irradiation; aPDL1-LA, anti-PDL1-modified liposomes-encapsulated AuNRs; aPDL1-LA+NIR, anti-PDL1-modified liposomes-encapsulated AuNRs with near-infrared irradiation.

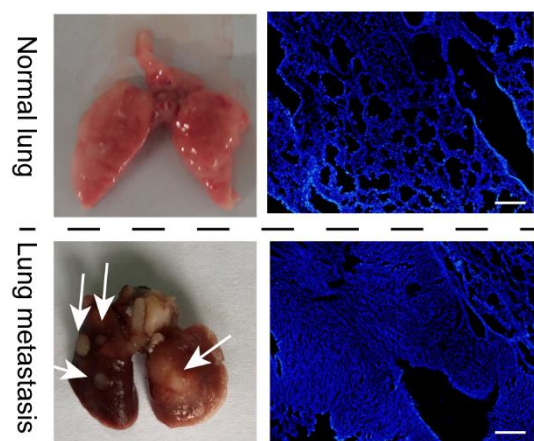

**Figure S12** The appearance of tumor nodules in lung tissue. Lung tissues were collected from LLC Lung metastases-bearing mice and frozen sections were stained with Hoechst 33258 observed by confocal laser scanning microscope.

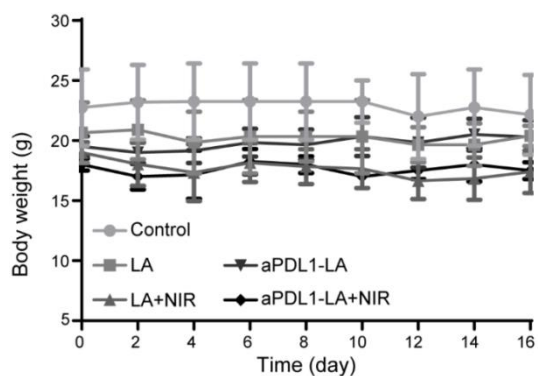

**Figure S13** Body weight changes of LLC lung metastasis cancer-bearing mice. Data are presented as mean  $\pm$ SD ( $n=5$ ).

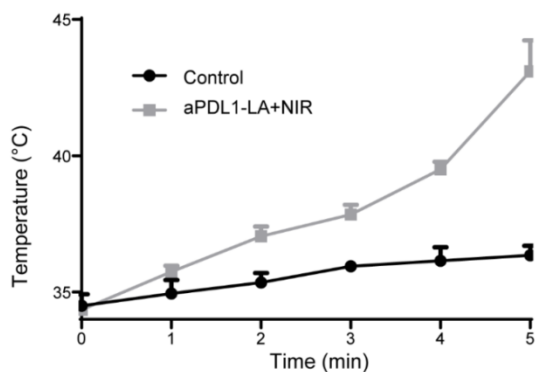

**Figure S14** The temperature changes of the lung tissue based on Fig. 5B. Data are presented as mean  $\pm$ SD ( $n=3$ ).

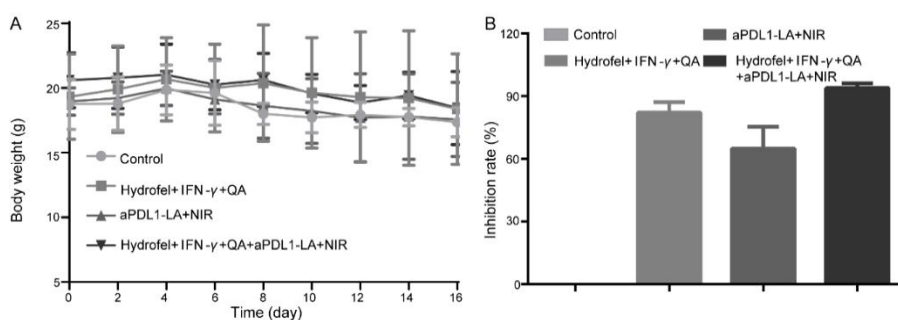

**Figure S15** Body weight changes and tumor inhibition rate. (A) Body weight change of subcutaneous LLC and LLC Lung metastases-bearing mice; (B) The tumor inhibition rate of LLC subcutaneous tumor. Control group: no treatment group; Hydrogel+IFN- $\gamma$ +QA group: local injection of Hydrogel+IFN- $\gamma$ +QA; aPDL1-LA+NIR group: intravenous injection of aPDL1-LA with 808 nm laser irradiation; Hydrogel+IFN- $\gamma$ +QA+aPDL1-LA+NIR group: local injection of Hydrogel+IFN- $\gamma$ +QA on Day 0 and intravenous injection of aPDL1-LA on Days 1, 3 and 5 with 808 nm laser irradiation. Data are presented as mean  $\pm$ SD ( $n=5$ ).

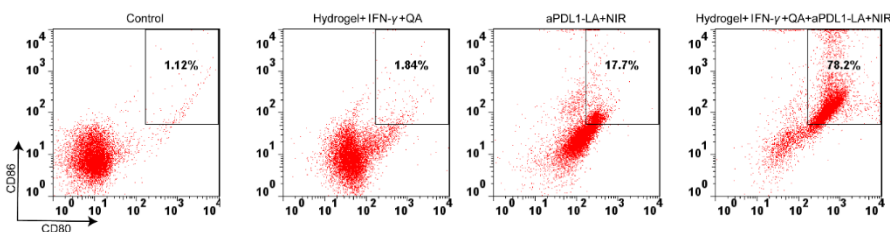

**Figure S16** DC maturation induced by synergistic immunotherapy on subcutaneous LLC and LLC Lung metastases-bearing mice (gated on CD11c<sup>+</sup> DC cells). Lymph nodes were collected after the treatment, disrupted, stained with anti-CD80-APC and anti-CD86-FITC and tested by flow cytometry ( $n=3$ ,  $1 \times 10^4$  cells measured). Control group: no treatment group; Hydrogel+IFN- $\gamma$ +QA group: local injection of Hydrogel+IFN- $\gamma$ +QA; aPDL1-LA+NIR group: intravenous injection of aPDL1-LA with 808 nm laser irradiation; Hydrogel+IFN- $\gamma$ +QA+aPDL1-LA+NIR group: local

injection of Hydrogel+IFN- $\gamma$ +QA on Day 0 and intravenous injection of aPDL1-LA on Days 1, 3 and 5 with 808 nm laser irradiation.

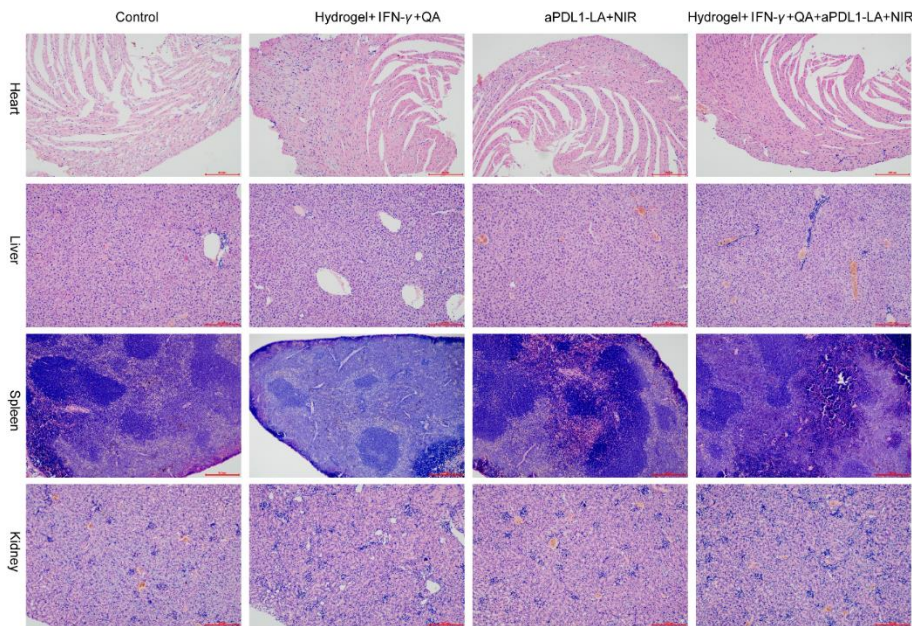

**Figure S17** Histopathological images of tissue sections. Main organs were harvested from subcutaneous LLC and LLC Lung metastases-bearing mice (scale bar=200  $\mu$ m) based on Fig. 6. Control group: no treatment group; Hydrogel+IFN- $\gamma$ +QA group: local injection of Hydrogel+IFN- $\gamma$ +QA; aPDL1-LA+NIR group: intravenous injection of aPDL1-LA with 808 nm laser irradiation; Hydrogel+IFN- $\gamma$ +QA+aPDL1-LA+NIR group: local injection of Hydrogel+IFN- $\gamma$ +QA on Day 0 and intravenous injection of aPDL1-LA on Days 1, 3 and 5 with 808 nm laser irradiation.

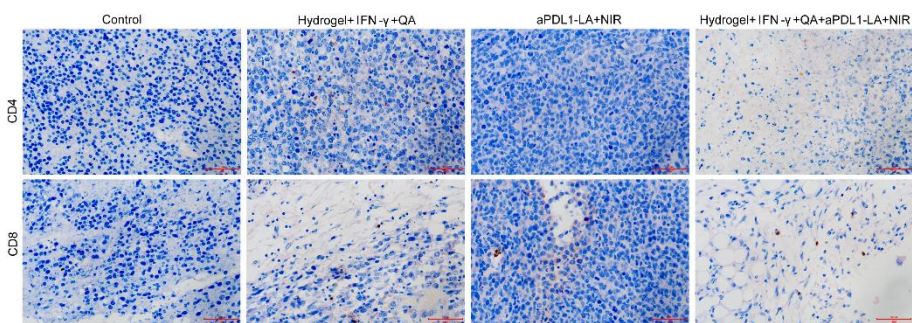

**Figure S18** The immunohistochemistry staining images of CD4<sup>+</sup> and CD8<sup>+</sup> T-lymphocytes in *in situ* recurrence tumors after different treatments. (Scale bar=50  $\mu$ m). Control group: no treatment group; Hydrogel+IFN- $\gamma$ +QA group: local injection of Hydrogel+IFN- $\gamma$ +QA; aPDL1-LA+NIR group: intravenous injection of aPDL1-LA with 808 nm laser irradiation; Hydrogel+IFN- $\gamma$ +QA+aPDL1-LA+NIR group: local injection of Hydrogel+IFN- $\gamma$ +QA on Day 0 and intravenous injection of aPDL1-LA on Days 1, 3 and 5 with 808 nm laser irradiation.

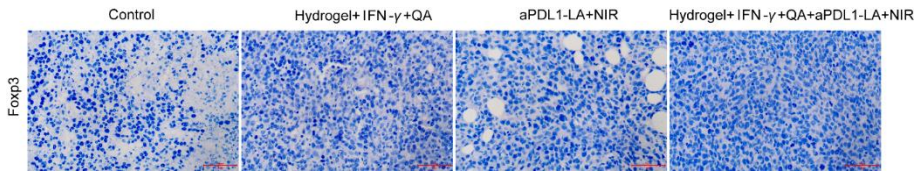

**Figure S19** The immunohistochemistry staining images of Treg cells in *in situ* recurrence tumors after different treatments based on Figure 6. (Scale bar=50  $\mu\text{m}$ ). Control group: no treatment group; Hydrogel+IFN- $\gamma$ +QA group: local injection of Hydrogel+IFN- $\gamma$ +QA; aPDL1-LA+NIR group: intravenous injection of aPDL1-LA with 808 nm laser irradiation; Hydrogel+IFN- $\gamma$ +QA+aPDL1-LA+NIR group: local injection of Hydrogel+IFN- $\gamma$ +QA on Day 0 and intravenous injection of aPDL1-LA on Days 1, 3 and 5 with 808 nm laser irradiation.

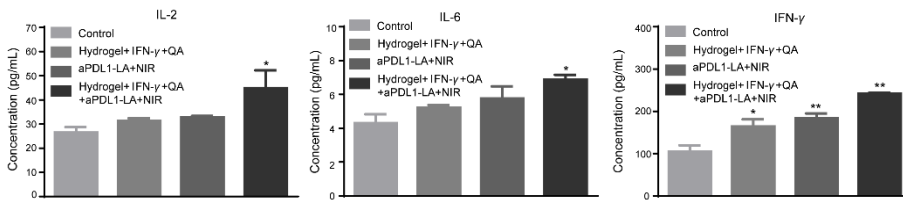

**Figure S20** Immune cytokine levels in sera isolated from mice on Day 9. Control group: no treatment group; Hydrogel+IFN- $\gamma$ +QA group: local injection of Hydrogel+IFN- $\gamma$ +QA; aPDL1-LA+NIR group: intravenous injection of aPDL1-LA with 808 nm laser irradiation; Hydrogel+IFN- $\gamma$ +QA+aPDL1-LA+NIR group: local injection of Hydrogel+IFN- $\gamma$ +QA on Day 0 and intravenous injection of aPDL1-LA on Days 1, 3 and 5 with 808 nm laser irradiation. Data are presented as mean $\pm$ SD ( $n=3$ ). \* $P<0.05$ , \*\* $P<0.01$  compared with control group by ANOVA analysis.
